# Supplementary material for: Influence of Dietary n-3 Long Chain Polyunsaturated Fatty Acid Intake on Oxylipins in Erythrocytes of Women with Rheumatoid Arthritis
Source: MDPI journal article supplement (doi:10.3390/molecules28020717), 2023-01-11
Supplement: s1 [file s1]

**Table S1.** Erythrocyte free fatty acids correlations to erythrocyte oxylipins.

|                | Free Arachidonic Acid |        | Free Adrenic Acid |       | Free EPA |       | Free DHA |       |
|----------------|-----------------------|--------|-------------------|-------|----------|-------|----------|-------|
|                | r                     | p      | r                 | p     | r        | p     | r        | p     |
| Tetranor-PGFM  | -0.083                | 0.706  | -0.04             | 0.858 | -0.124   | 0.574 | -0.116   | 0.599 |
| 12-HHTrE       | 0.274                 | 0.206  | 0.303             | 0.16  | 0.23     | 0.29  | 0.238    | 0.273 |
| 11-HETE        | 0.097                 | 0.66   | 0.207             | 0.344 | 0.145    | 0.508 | 0.123    | 0.578 |
| 9-HETE         | -0.212                | 0.33   | -0.196            | 0.371 | -0.067   | 0.76  | -0.127   | 0.564 |
| 5-HETE         | 0.293                 | 0.174  | 0.333             | 0.121 | 0.373    | 0.08  | 0.38     | 0.073 |
| 15-HETE        | 0.184                 | 0.401  | 0.174             | 0.427 | 0.228    | 0.295 | 0.209    | 0.337 |
| 5,15-diHETE    | 0.1                   | 0.65   | 0.13              | 0.556 | 0.119    | 0.59  | 0.14     | 0.523 |
| 8-HETE         | 0.470*                | 0.024  | 0.440*            | 0.036 | 0.497*   | 0.016 | 0.441*   | 0.035 |
| 12-HETE        | 0.132                 | 0.547  | 0.191             | 0.383 | 0.23     | 0.291 | 0.251    | 0.248 |
| 19-HETE        | -0.199                | 0.363  | -0.24             | 0.269 | -0.26    | 0.231 | -0.29    | 0.179 |
| 11(12)-EET     | 0.646**               | <0.001 | 0.610**           | 0.002 | 0.567**  | 0.005 | 0.517*   | 0.011 |
| 11,12-diHETErE | 0.336                 | 0.117  | 0.418*            | 0.047 | 0.25     | 0.251 | 0.344    | 0.108 |
| 14(15)-EET     | 0.442*                | 0.035  | 0.430*            | 0.041 | 0.348    | 0.103 | 0.347    | 0.105 |
| 14,15-diHETrE  | 0.438*                | 0.037  | 0.517*            | 0.012 | 0.264    | 0.224 | 0.339    | 0.114 |
| 5,6-diHETrE    | 0.387                 | 0.068  | 0.481*            | 0.02  | 0.335    | 0.096 | 0.427*   | 0.042 |
| 9-HEPE         | 0.265                 | 0.222  | 0.139             | 0.528 | 0.454*   | 0.029 | 0.334    | 0.119 |
| 11-HEPE        | 0.274                 | 0.206  | 0.297             | 0.169 | 0.381    | 0.073 | 0.3      | 0.165 |
| 18-HEPE        | 0.135                 | 0.54   | 0.143             | 0.515 | 0.238    | 0.275 | 0.169    | 0.441 |
| 15-HEPE        | 0.084                 | 0.703  | 0.111             | 0.615 | 0.206    | 0.346 | 0.081    | 0.713 |
| 12-HEPE        | 0.081                 | 0.714  | 0.031             | 0.889 | 0.12     | 0.585 | 0.046    | 0.833 |
| 4-HDoHE        | 0.184                 | 0.4    | 0.133             | 0.546 | 0.335    | 0.118 | 0.272    | 0.209 |
| 8-HDoHE        | 0.2                   | 0.361  | 0.265             | 0.222 | 0.22     | 0.313 | 0.239    | 0.273 |
| 16-HDoHE       | 0.295                 | 0.171  | 0.356             | 0.096 | 0.404    | 0.056 | 0.417*   | 0.048 |
| 20-HDoHE       | 0.203                 | 0.352  | 0.229             | 0.292 | 0.31     | 0.12  | 0.346    | 0.106 |
| 13-HDoHE       | -0.013                | 0.953  | -0.034            | 0.878 | -0.067   | 0.762 | 0.005    | 0.982 |
| 10-HDoHE       | 0.201                 | 0.953  | -0.034            | 0.878 | -0.067   | 0.762 | 0.005    | 0.982 |
| 14-HDoHE       | 0.558**               | 0.006  | 0.586**           | 0.003 | 0.547**  | 0.007 | 0.528**  | 0.01  |
| 16(17)-EpDPE   | 0.419*                | 0.047  | 0.318             | 0.139 | 0.554**  | 0.006 | 0.501*   | 0.015 |
| 15-HETrE       | 0.031                 | 0.89   | -0.01             | 0.964 | 0.108    | 0.625 | 0.063    | 0.774 |
| 9-HOTrE        | 0.435*                | 0.038  | 0.453*            | 0.03  | 0.462*   | 0.027 | 0.444*   | 0.034 |
| 13-HODE        | 0.093                 | 0.673  | 0.119             | 0.59  | 0.208    | 0.34  | 0.186    | 0.396 |
| 9-HODE         | 0.105                 | 0.634  | 0.119             | 0.59  | 0.208    | 0.34  | 0.186    | 0.396 |
| 9-oxoODE       | -0.082                | 0.71   | 0.075             | 0.733 | -0.011   | 0.961 | -0.07    | 0.75  |

|                       |         |        |         |        |         |        |         |        |
|-----------------------|---------|--------|---------|--------|---------|--------|---------|--------|
| 9(10)-EpOME           | -0.046  | 0.833  | 0.024   | 0.914  | 0.048   | 0.83   | -0.023  | 0.918  |
| 9,10-diHOME           | -0.04   | 0.858  | -0.08   | 0.717  | 0.082   | 0.71   | -0.037  | 0.868  |
| 12(13)-EpOME          | -0.053  | 0.809  | 0.068   | 0.757  | -0.079  | 0.72   | -0.064  | 0.771  |
| 12,13-diHOME          | -0.071  | 0.747  | -0.166  | 0.449  | 0.033   | 0.883  | -0.124  | 0.574  |
| Free Arachidonic Acid |         |        | 0.944** | <0.001 | 0.940** | <0.001 | 0.944** | <0.001 |
| Free Adrenic Acid     | 0.944** | <0.001 |         |        | 0.859** | <0.001 | 0.908** | <0.001 |
| Free EPA              | 0.940** | <0.001 | 0.859** | <0.001 |         |        | 0.944** | <0.001 |
| Free DHA              | 0.944** | <0.001 | 0.908** | <0.001 | 0.944** | <0.001 |         |        |

\*  $p < 0.05$ , \*\* $p < 0.01$ , Spearman correlation coefficients and  $p$ -values for free fatty acids and oxylipins.

Oxylipins: prostaglandin F Metabolite (PGFM), hydroxyheptadecatrienoic acid (HHTre), hydroxyoctadecatrienoic acid (HOTre), epoxyoctadecenoic acid (EpOME), dihydroxy-octadecenoic acid (diHOME), hydroxyoctadecadienoic acid (HODE), hydroxyeicosapentaenoic acid (HEPE), hydroxydocosahexaenoic acid (HDoHE), hydroxyeicosatrienoic acid (HETre), dihydroxyeicosa-trienoic acid (di-HEIre), oxo-octadecadienoic acid (oxoODE), hydroxyeicosatetraenoic (HETE), dihydroxyeicosatetraenoic acid (diHETE), epoxy-eicosatrienoic acid (EET), epoxy-docosapentaenoic acid (EpDPE).

**Table S2.** Erythrocyte free fatty acids(%) correlations to erythrocyte oxylipins.

|                | Linoleic acid<br>(18:2n-6) |       | $\alpha$ -linolenic acid<br>(18:3 n-3) |       | Linoleic acid<br>(20:3 n-6) |       | Arachidonic acid<br>(20:4 n-6) |       | Eicosapentaenoic<br>acid (20:5 n-3) |       | Docosahexaenoic<br>acid (22:6 n-3) |        |
|----------------|----------------------------|-------|----------------------------------------|-------|-----------------------------|-------|--------------------------------|-------|-------------------------------------|-------|------------------------------------|--------|
|                | r                          | p     | r                                      | p     | r                           | p     | r                              | p     | r                                   | p     | r                                  | p      |
| Tetranor-PGFM  | 0.107                      | 0.628 | 0.193                                  | 0.378 | -0.208                      | 0.342 | 0.255                          | 0.24  | 0.034                               | 0.879 | -0.383                             | 0.071  |
| 12-HHTrE       | -0.364                     | 0.088 | 0.095                                  | 0.666 | -0.508*                     | 0.013 | 0.196                          | 0.37  | 0.047                               | 0.83  | 0.014                              | 0.95   |
| 11-HETE        | -0.114                     | 0.606 | 0.357                                  | 0.095 | -0.152                      | 0.488 | -0.231                         | 0.288 | -0.081                              | 0.713 | -0.089                             | 0.687  |
| 9-HETE         | -0.155                     | 0.48  | 0.243                                  | 0.264 | -0.023                      | 0.918 | -0.251                         | 0.248 | -0.043                              | 0.847 | -0.209                             | 0.339  |
| 5-HETE         | -0.169                     | 0.441 | 0.289                                  | 0.2   | -0.102                      | 0.644 | -0.329                         | 0.125 | -0.024                              | 0.914 | 0.18                               | 0.412  |
| 15-HETE        | -0.347                     | 0.105 | 0.264                                  | 0.224 | -0.299                      | 0.165 | -0.039                         | 0.861 | 0.031                               | 0.89  | -0.01                              | 0.964  |
| 5,15-diHETE    | 0.049                      | 0.832 | 0.313                                  | 0.146 | -0.412                      | 0.05  | -0.286                         | 0.186 | 0.28                                | 0.196 | 0.221                              | 0.312  |
| 8-HETE         | -0.469*                    | 0.024 | 0.183                                  | 0.403 | -0.22                       | 0.314 | 0.072                          | 0.743 | 0.272                               | 0.209 | 0.073                              | 0.74   |
| 12-HETE        | -0.384                     | 0.07  | 0.181                                  | 0.409 | -0.077                      | 0.727 | -0.03                          | 0.893 | 0.187                               | 0.394 | -0.076                             | 0.73   |
| 19-HETE        | 0.213                      | 0.329 | -0.431*                                | 0.04  | 0.219                       | 0.315 | 0.107                          | 0.627 | -0.24                               | 0.269 | 0.069                              | 0.753  |
| 11(12)-EET     | -0.4                       | 0.058 | 0.06                                   | 0.785 | 0.001                       | 0.996 | 0.451*                         | 0.031 | 0.216                               | 0.321 | -0.075                             | 0.73.5 |
| 11,12-diHETErE | -0.538*                    | 0.008 | -0.099                                 | 0.652 | -0.234                      | 0.281 | 0.462*                         | 0.026 | *0.02                               | 0.928 | 0.001                              | 0.996  |
|                | *                          |       |                                        |       |                             |       |                                |       |                                     |       |                                    |        |
| 14(15)-EET     | -0.444*                    | 0.034 | -0.340                                 | 0.158 | -0.09                       | 0.682 | 0.422*                         | 0.045 | 0.079                               | 0.72  | -0.074                             | 0.737  |
| 14,15-diHETrE  | -0.474*                    | 0.022 | -0.182                                 | 0.406 | -0.048                      | 0.826 | 0.478*                         | 0.021 | -0.148                              | 0.5   | -0.125                             | 0.568  |
| 5,6-diHETrE    | -0.331                     | 0.122 | -0.029                                 | 0.897 | 0.246                       | 0.257 | -0.027                         | 0.904 | -0.148                              | 0.5   | -0.125                             | 0.612  |
| 9-HEPE         | -0.276                     | 0.202 | 0.445*                                 | 0.033 | -0.349                      | 0.102 | -0.25                          | 0.251 | 0.529**                             | 0.009 | 0.306                              | 0.156  |
| 11-HEPE        | -0.31                      | 0.15  | 0.191                                  | 0.383 | -0.408                      | 0.053 | -0.312                         | 0.149 | 0.489*                              | 0.018 | 0.461*                             | 0.027  |
| 18-HEPE        | -0.189                     | 0.389 | 0.26                                   | 0.231 | -0.33                       | 0.124 | -0.326                         | 0.128 | 0.409                               | 0.053 | 0.142                              | 0.519  |
| 15-HEPE        | -0.186                     | 0.396 | 0.128                                  | 0.562 | -0.145                      | 0.508 | -0.192                         | 0.38  | 0.094                               | 0.67  | 0.129                              | 0.559  |
| 12-HEPE        | -0.274                     | 0.207 | 0.268                                  | 0.215 | -0.245                      | 0.259 | -0.189                         | 0.388 | -0.002                              | 0.995 | -0.029                             | 0.869  |
| 4-HDoHE        | -0.367                     | 0.085 | 0.393                                  | 0.063 | -0.525*                     | 0.01  | -0.105                         | 0.635 | 0.475*                              | 0.022 | 0.197                              | 0.367  |
| 8-HDoHE        | -0.128                     | 0.56  | -0.085                                 | 0.699 | -0.272                      | 0.209 | -0.051                         | 0.819 | -0.252                              | 0.247 | 0.088                              | 0.689  |
| 16-HDoHE       | -0.420*                    | 0.046 | -0.089                                 | 0.686 | -0.166                      | 0.448 | 0.106                          | 0.63  | 0.187                               | 0.392 | 0.174                              | 0.727  |
| 20-HDoHE       | -0.420*                    | 0.046 | -0.089                                 | 0.686 | -0.166                      | 0.448 | 0.106                          | 0.63  | 0.187                               | 0.392 | 0.174                              | 0.426  |
| 13-HDoHE       | 0.042                      | 0.848 | 0.203                                  | 0.352 | -0.348                      | 0.103 | 0.007                          | 0.975 | 0.084                               | 0.704 | -0.234                             | 0.283  |
| 10-HDoHE       | -0.503*                    | 0.014 | -0.052                                 | 0.815 | -0.151                      | 0.492 | 0.481*                         | 0.02  | 0.231                               | 0.288 | -0.131                             | 0.551  |
| 14-HDoHE       | -0.439*                    | 0.036 | 0.085                                  | 0.701 | -0.269                      | 0.215 | 0.05                           | 0.822 | 0.256                               | 0.239 | 0.222                              | 0.309  |
| 16(17)-EpDPE   | -0.424*                    | 0.044 | 0.173                                  | 0.43  | -0.404                      | 0.056 | -0.178                         | 0.417 | 0.420*                              | 0.046 | 0.368                              | 0.084  |
| 15-HETrE       | -0.181                     | 0.409 | 0.025                                  | 0.911 | 0.016                       | 0.943 | -0.055                         | 0.802 | -0.166                              | 0.449 | -0.073                             | 0.74   |
| 9-HOTrE        | -0.22                      | 0.312 | 0.332                                  | 0.122 | -0.304                      | 0.158 | 0.004                          | 0.986 | 0.381                               | 0.073 | 0.047                              | 0.832  |
| 13-HODE        | -0.065                     | 0.768 | 0.486*                                 | 0.019 | -0.164                      | 0.455 | -0.347                         | 0.105 | 0.021                               | 0.925 | -0.048                             | 0.826  |
| 9-HODE         | -0.11                      | 0.618 | 0.512*                                 | 0.013 | -0.089                      | 0.687 | -0.193                         | 0.378 | 0.022                               | 0.922 | -0.267                             | 0.218  |
| 9-oxoODE       | 0.114                      | 0.606 | 0.461*                                 | 0.027 | 0.263                       | 0.226 | -0.123                         | 0.578 | -0.193                              | 0.378 | -0.354                             | 0.098  |

|                                        |         |       |         |       |        |       |         |       |         |       |         |       |
|----------------------------------------|---------|-------|---------|-------|--------|-------|---------|-------|---------|-------|---------|-------|
| 9(10)-EpOME                            | 0.077   | 0.727 | 0.535** | 0.009 | -0.186 | 0.396 | -0.4    | 0.058 | 0.043   | 0.844 | -0.127  | 0.562 |
| 9,10-diHOME                            | 0.378   | 0.075 | 0.391   | 0.065 | 0.15   | 0.494 | -0.274  | 0.206 | -0.462  | 0.46  | -0.123  | 0.578 |
| 12(13)-EpOME                           | 0.122   | 0.581 | 0.373   | 0.08  | 0.002  | 0.993 | -0.33   | 0.124 | -0.232  | 0.286 | -0.148  | 0.5   |
| 12,13-diHOME                           | 0.096   | 0.664 | 0.570** | 0.005 | -0.053 | 0.809 | -0.294  | 0.173 | -0.123  | 0.578 | -0.157  | 0.474 |
| Linoleic acid<br>(18:2n-6)             |         |       | 0.204   | 0.352 | 0.202  | 0.356 | -0.430* | 0.041 | -0.365  | 0.087 | -0.157  | 0.474 |
| $\alpha$ -linolenic acid<br>(18:3 n-3) | 0.204   | 0.352 |         |       | 0.008  | 0.971 | -0.432* | 0.04  | 0.212   | 0.33  | -0.148  | 0.5   |
| Linoleic acid<br>(20:3 n-6)            | 0.202   | 0.356 | 0.008   | 0.971 |        |       | 0.142   | 0.517 | -0.358  | 0.094 | -0.286  | 0.187 |
| Arachidonic acid<br>(20:4 n-6)         | -0.430* | 0.041 | -0.432* | 0.04  | 0.142  | 0.517 |         |       | -0.233  | 0.284 | -0.447* | 0.033 |
| Eicosapentaenoic<br>acid (20:5 n-3)    | -0.365  | 0.087 | 0.212   | 0.33  | -0.358 | 0.094 | -0.233  | 0.284 |         |       | 0.535** | 0.009 |
| Docosahexaenoic<br>acid (22:6 n-3)     | -0.157  | 0.474 | -0.148  | 0.5   | -0.286 | 0.187 | -0.447* | 0.033 | 0.535** | 0.009 |         |       |

\* $p < 0.05$ , \*\*  $p < 0.01$ , Spearman correlation coefficients and  $p$ -values for fatty acids and lipids. Olay lipins: prostaglandin F Metabolite (PGFM),

hydroxyheptadecatrienoic acid (HHTe), hydroxyoctadecatrienoic acid (HOTnE), eicosadecadienoic acid (EpOME), dihydroxyoctadecanoic acid (dHOME) hydroxyoctadecadienoic acid (HODE) in hydroxyeicosapentaenoic acid (HEPE), hydroxy docosahexanoic acid (HDoHE, hydroxyeicosatrienoic acid

(HETnE), dihydroxyeicosatrienoic acid (d-HET1E), oxo-octadecadienoic acid (axODE), hydroxy eicosatrienoic acid (HETE) dihydroxy eicosatrienoic acid (diHETE), epoxy-eicosatrienoic acid (EET), epoxy-docosapentaenoic acid EpDPE). \* $p < 0.05$ , \*\*  $p < 0.01$
